# Supplementary material for: DNA double-strand break repair pathway choice inDictyostelium
Source: Oxford University Press journal article supplement (doi:10.1242/jcs.081471), 2011-05-02
Supplement: jcs081471figs1.pdf [file jcs081471figs1.pdf]

**A**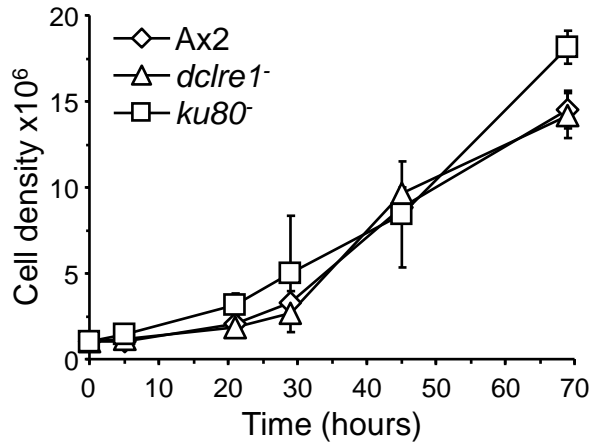**B**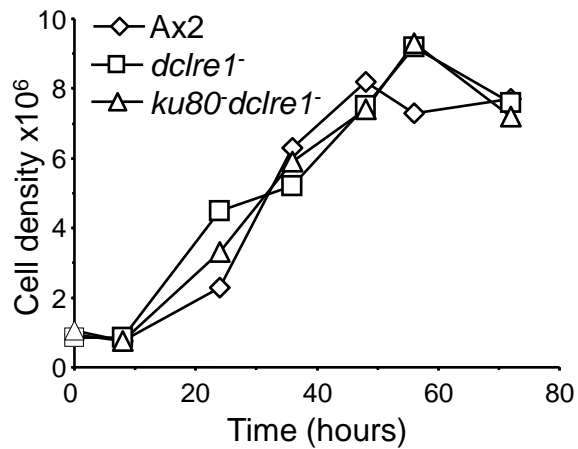

**Fig. S1. Growth rate of strains in the absence of DNA damage.**

A. Ax2, *dclre1*<sup>-</sup> or *ku80*<sup>-</sup> cells were seeded at a density of  $1 \times 10^6$  and cell density was determined at the indicated time points. Each point represents the SEM of 3 replicates.

B. Ax2, *dclre1*<sup>-</sup> or *ku80 dclre1*<sup>-</sup> cells were seeded at a density of  $1 \times 10^6$  and cell density was determined at the indicated time points.
