# Supplementary material for: DNA double-strand break repair pathway choice inDictyostelium
Source: Oxford University Press journal article supplement (doi:10.1242/jcs.081471), 2011-05-02
Supplement: jcs081471figs2.pdf [file jcs081471figs2.pdf]

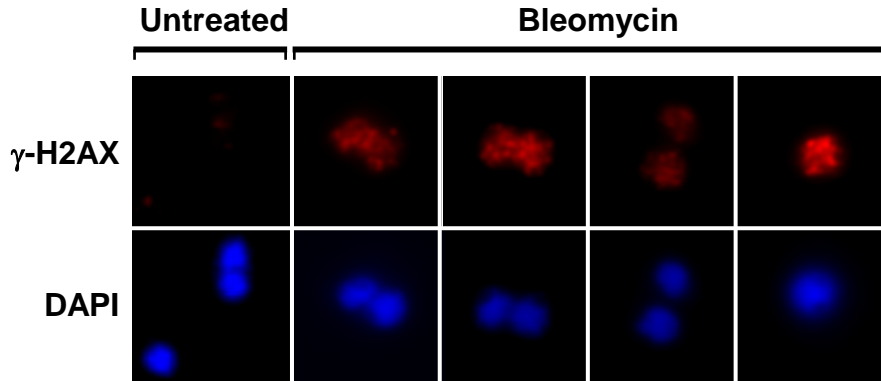

**Supplementary Figure S2: DSB-induced nuclear staining for  $\gamma$ -H2AX.**

Ax2 cells were left untreated or exposed to 100mU/ml of bleomycin for 1 hour. Cells were processed, stained with antibodies raised against  $\gamma$ -H2AX, and subjected to immunofluorescence as described in Materials and Methods. Several representative patterns of DSB-induced  $\gamma$ -H2AX staining are illustrated.
