# Supplementary material for: DNA double-strand break repair pathway choice inDictyostelium
Source: Oxford University Press journal article supplement (doi:10.1242/jcs.081471), 2011-05-02
Supplement: jcs081471figs3.pdf [file jcs081471figs3.pdf]

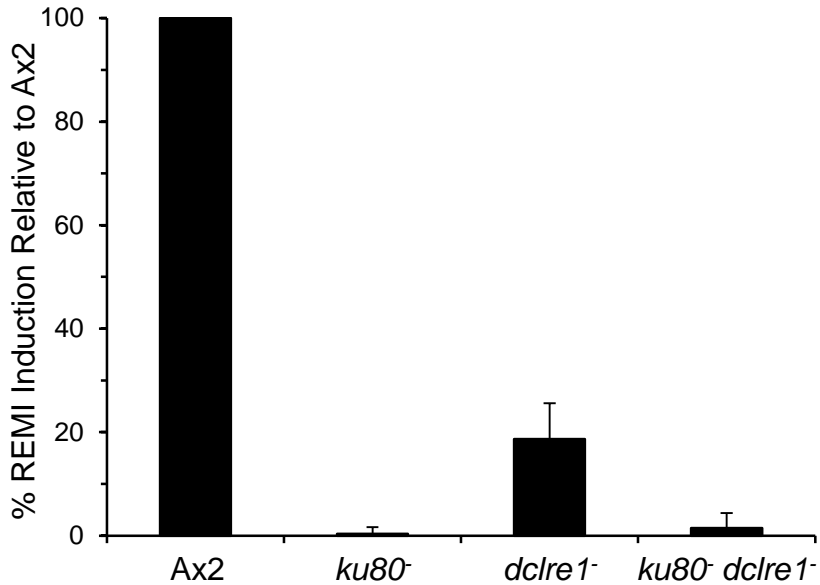

**Fig. S3: REMI of plasmid DNA into *Dictyostelium* genome is defective in *ku80 dclre1*<sup>-</sup> cells.**

*Ax2*, *ku80*<sup>-</sup>, *dclre1*<sup>-</sup> and *ku80 dclre1*<sup>-</sup> cells were transfected with *Bam*HI linearised vector containing a blasticidin resistant cassette either alone or in combination with *Bam*HI. Following selection, blasticidin resistant colonies were scored for each transfection and REMI efficiency calculated for each strain as fold induction in number of blasticidin resistant colonies achieved by addition of *Bam*HI. Data is represented as the % induction of a given strain relative to the parental *Ax2* strain. Error bars represent standard error of the mean (SEM) from four independent experiments.
